# Supplementary material for: Investigation on the Micro-Grinding Induced Crystallographic Variations of Nine Different Clinkers
Source: Springer Nature journal article supplement (doi:10.1186/s40069-024-00660-5), 2024-04-16
Supplement: MOESM1 [file 26988002]

**Investigation on the micro-grinding induced crystallographic variations of nine different clinkers**

Hyunuk Kanga, Jihoon Leea, Jun-Boum Parka,b, Juhyuk Moona,b,*

a Department of Civil and Environmental Engineering, Seoul National University, 1 Gwanak-ro, Gwanak-gu, Seoul 08826, Republic of Korea

b Institute of Construction and Environmental Engineering, Seoul National University, 1 Gwanak-ro, Gwanak-gu, Seoul 08826, Republic of Korea

* Corresponding author: [juhyukmoon@snu.ac.kr](mailto:juhyukmoon@snu.ac.kr)


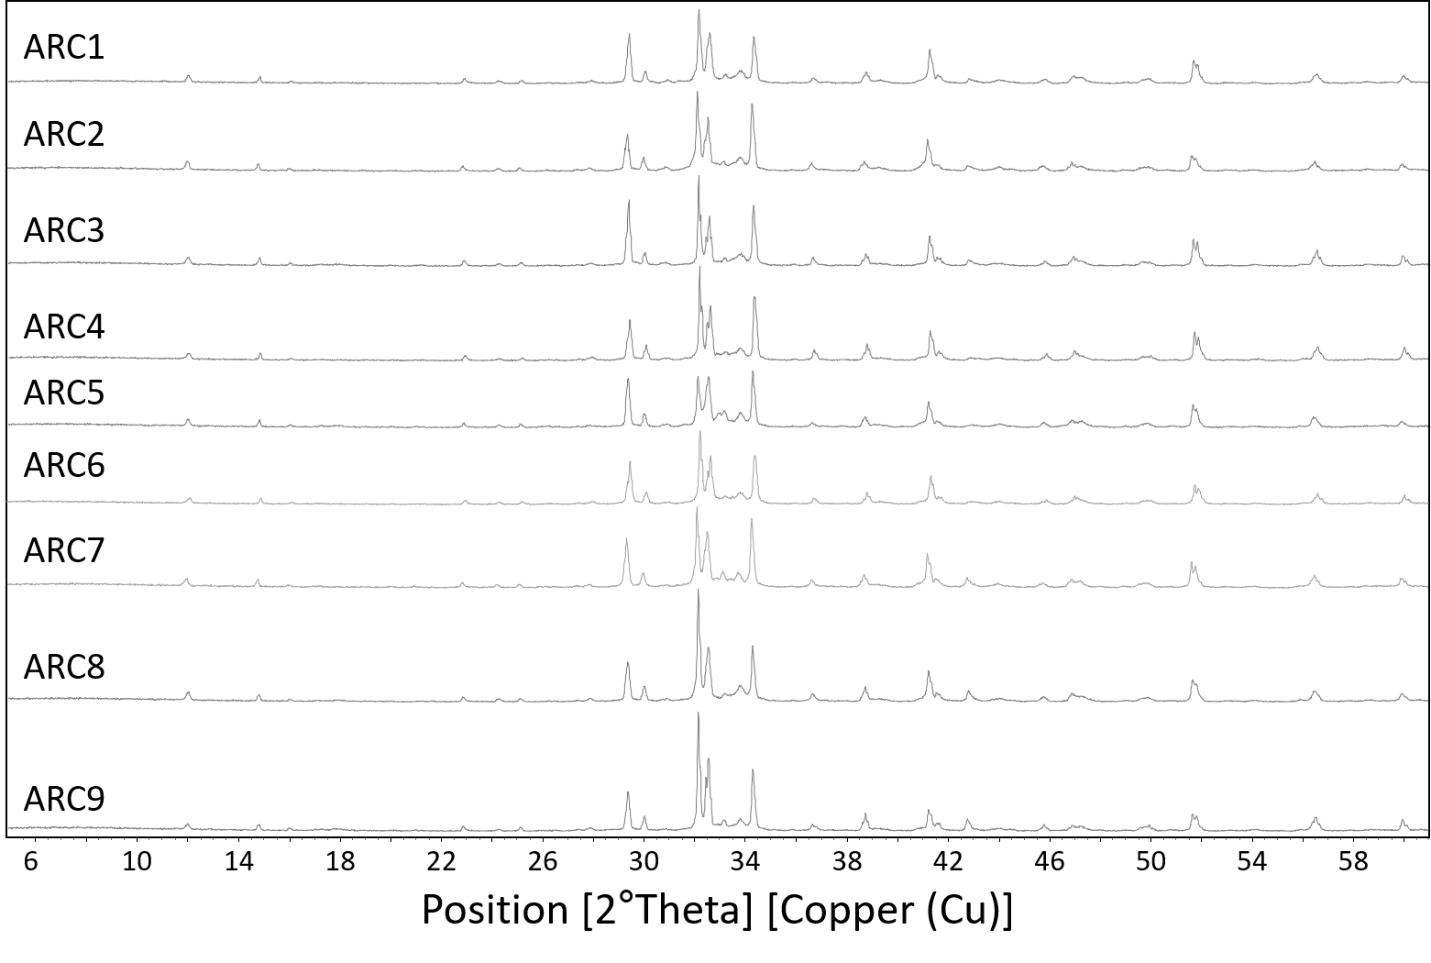


**Fig. S1.** X-ray diffraction patterns of ARC


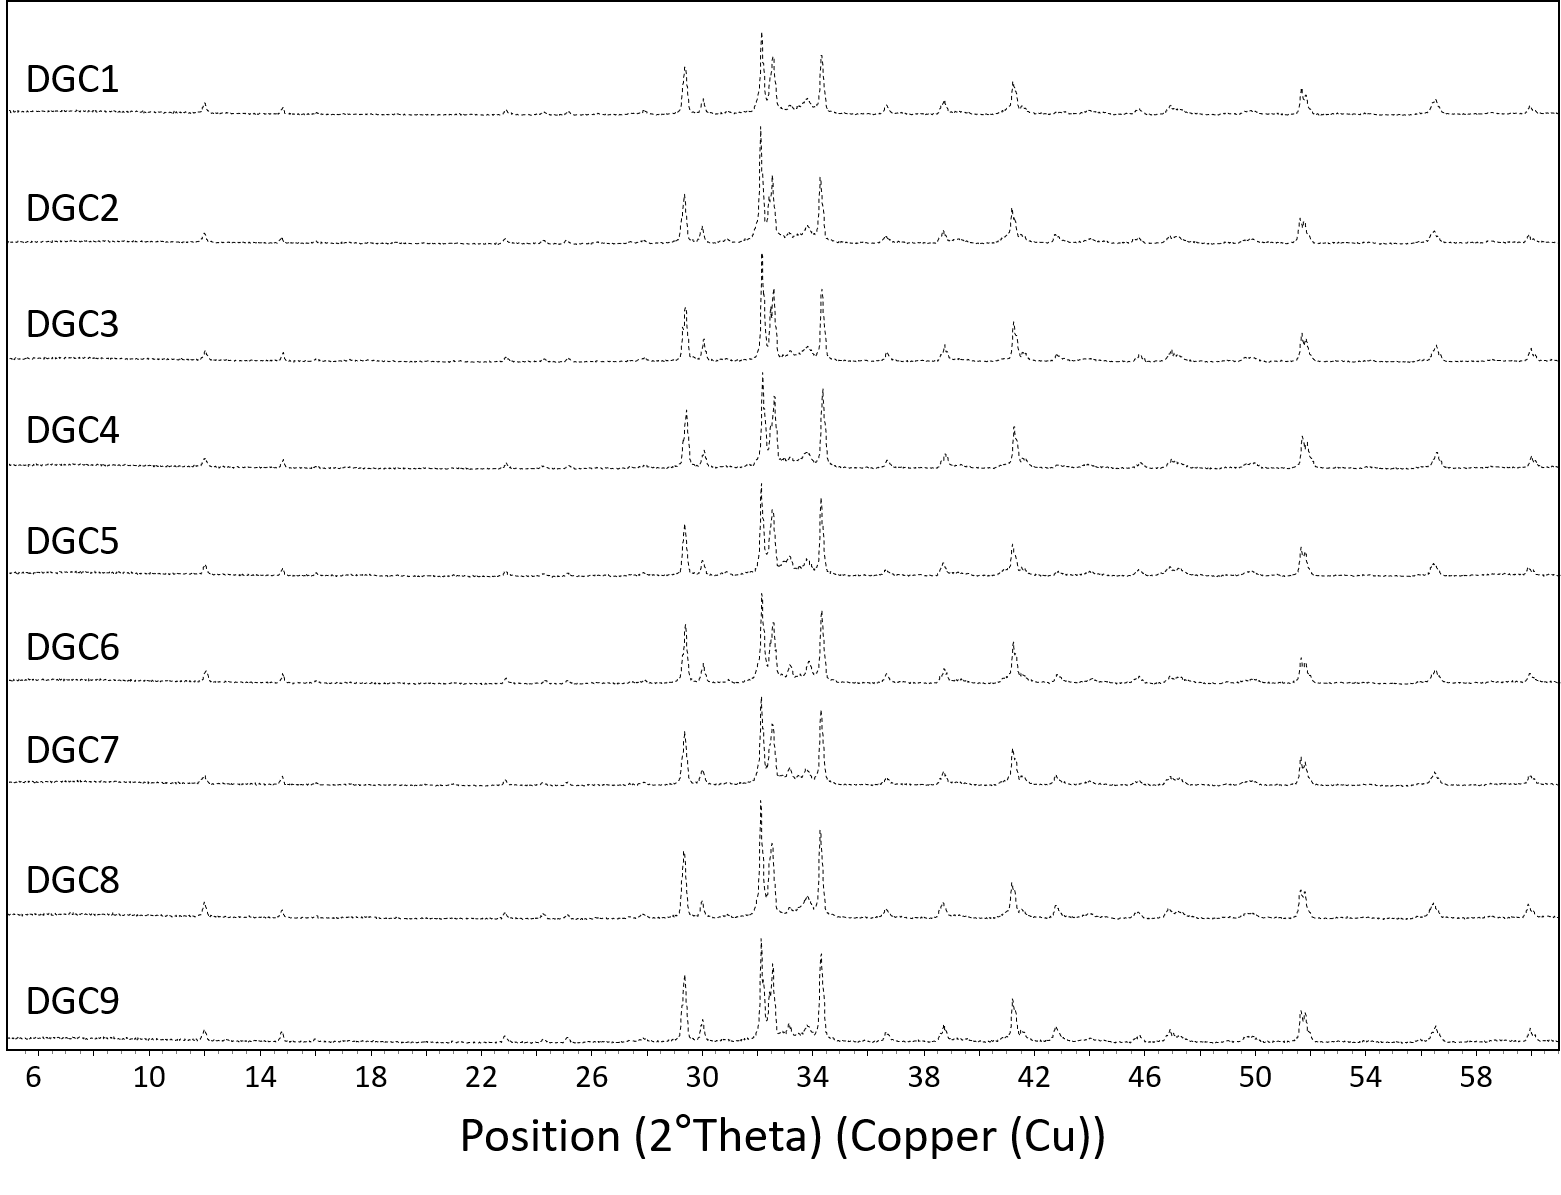


**Fig. S2.** X-ray diffraction patterns of DGC


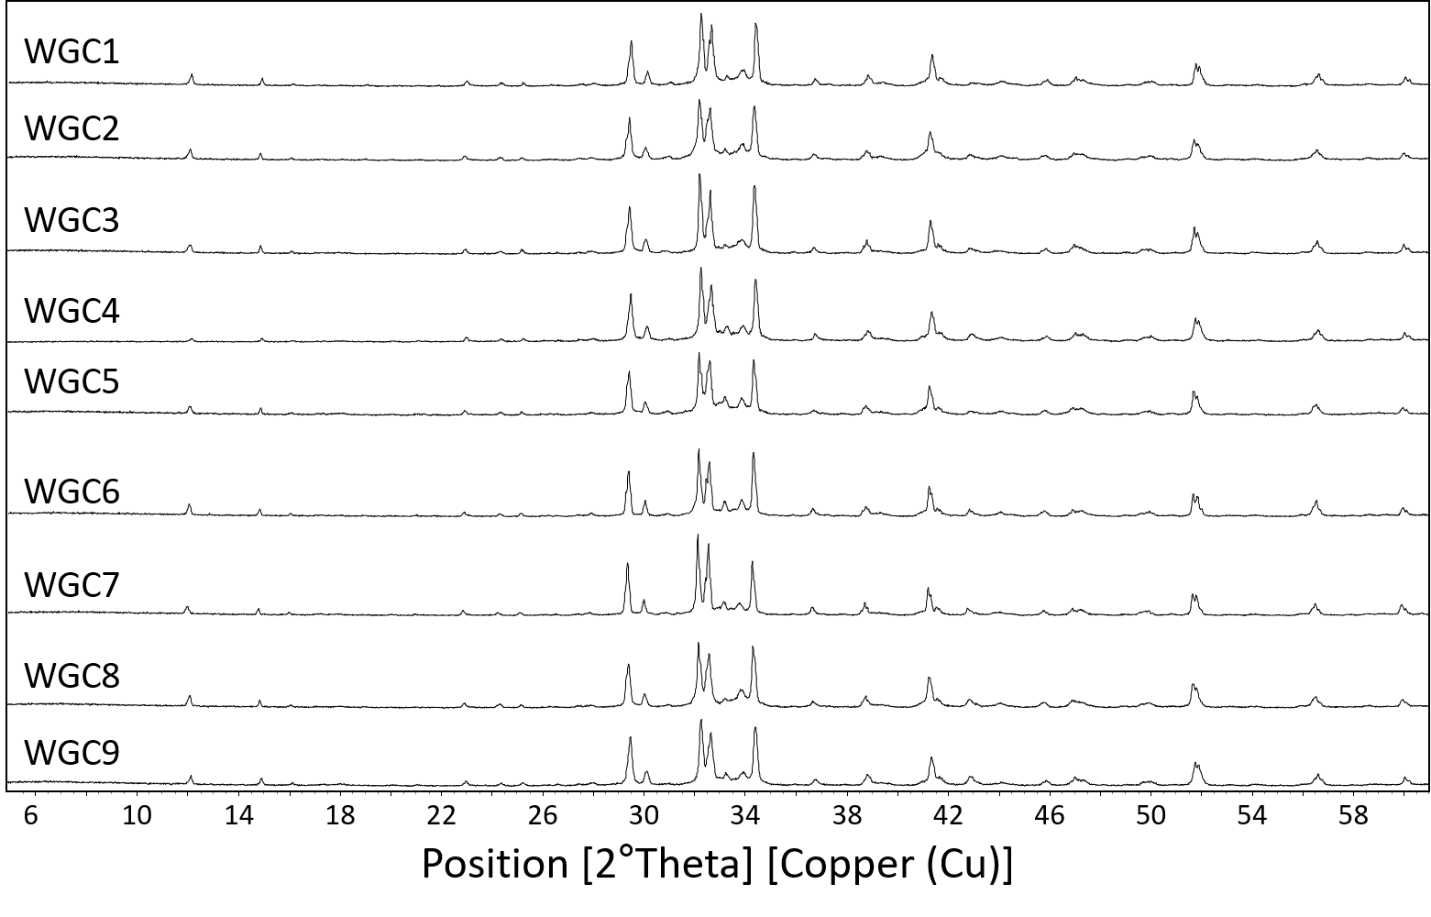


**Fig. S3.** X-ray diffraction patterns of WGC

**Table S1.** QXRPD analysis results of ARC considering C3S (T1 & r). The averaged weight percentage and standard deviation of three analysed results are presented

| Phase (wt.%) | ARC1 | ARC2 | ARC3 | ARC4 | ARC5 | ARC6 | ARC7 | ARC8 | ARC9 |
| --- | --- | --- | --- | --- | --- | --- | --- | --- | --- |
| Alite (M3) | 54.8  (0.5) | 50.3  (4.6) | 59.5  (5.3) | 53.4  (0.4) | 48.0  (0.6) | 51.7  (4.1) | 46.0  (0.4) | 39.3  (3.1) | 53.7  (0.2) |
| Alite (T1) | 4.3  (1.3) | 6.2  (0.7) | 3.7  (6.4) | 10.8  (0.6) | 11.5  (0.0) | 10.4  (2.4) | 14.3  (1.0) | 6.8  (2.2) | 6.3  (0.3) |
| Alite (r) | 0.1  (0.1) | - | 0.5  (0.9) | 0.4  (0.0) | - |  |  | - | - |
| Belite (Beta) | 14.2  (0.7) | 15.0  (3.3) | 8.4  (2.3) | 10.7  (0.2) | 9.7  (0.3) | 13.0  (1.3) | 8.3  (1.3) | 14.2  (2.3) | 8.9  (0.2) |
| Ferrite | 14.1  (0.1) | 12.5  (0.4) | 13.9  (0.2) | 12.6  (0.4) | 11.2  (0.1) | 9.7  (1.7) | 11.2  (1.0) | 10.6  (1.3) | 9.7  (0.4) |
| Aluminate (cubic) | 1.8  (0.3) | 1.7  (0.2) | 1.1  (0.3) | 1.2  (0.3) | 2.9  (0.1) | 2.6  (0.3) | 2.9  (0.1) | 1.5  (0.3) | 2.0  (0.3) |
| Aluminate (orthorhombic) | 0.6  (0.2) | 0.7  (0.6) | 0.1  (0.1) | 0.7  (0.1) | 2.3  (0.1) | 0.2  (0.2) | 0.6  (0.2) | - | - |
| Wollastonite | 2.4  (0.9) | 4.0  (0.1) | 4.1  (0.7) | 4.1  (0.2) | 2.03  (0.1) | 4.9  (0.3) | 3.7  (0.3) | 3.1  (0.7) | 5.0  (0.5) |
| Periclase | 1.1  (0.1) | 2.8  (0.7) | 4.4  (2.2) | 1.2  (0.1) | 1.3  (0.0) | 2.7  (0.0) | 3.2  (0.3) | 3.4  (0.6) | 4.4  (0.0) |
| Ca-ferrite | 0.7  (0.6) | - | - | - | - | 0.6  (0.5) | - | - | - |
| Hydrogrossular | 0.8  (0.0) | 1.9  (0.7) | - | - | 1.6  (0.3) | - | - | 0.3  (0.6) | 2.0  (0.5) |
| Olivine | 2.8  (0.0) | 2.0  (1.2) | 1.5  (2.3) | 2.9  (0.2) | 2.4  (0.3) | 3.1  (0.3) | 1.5  (0.6) | 0.9  (0.8) | - |
| Dolomite | 0.4  (0.3) | 1.0  (0.1) | 0.5  (0.3) | 0.7  (0.2) | 1.0  (0.2) | 0.5  (0.2) | 0.6  (0.0) | 0.4  (0.6) | - |
| Arcanite | 0.3  (0.0) | 0.5  (0.1) | 1.3  (0.2) | 0.1  (0.1) | 0.1  (0.1) | 0.1  (0.1) | 0.1  (0.0) | 0.2  (0.1) | 0.8  (0.0) |
| Pyrite | - | - | - | - | 0.1  (0.0) | - | - | - | - |
| Syngenite | 0.3  (0.2) | - | - | - | - | - | - | - | - |
| Portlandite | 0.1  (0.1) | 0.4  (0.0) | - | - | 0.1  (0.0) | 0.5  (0.0) | 0.1  (0.1) | 0.1  (0.1) | - |
| Amorphous | 1.2  (0.5) | 1.0  (0.6) | 1.0  (0.6) | 1.1  (0.8) | 5.8  (0.8) | - | 7.4  (1.4) | 19.3  (6.3) | 7.2  (1.1) |
| Rwp | 10.0 | 10.2 | 10.0 | 10.0 | 9.2 | 9.6 | 8.7 | 8.8 | 9.9 |

**Table S2.** QXRPD analysis results of DGC considering C3S (T1 & r). The averaged weight percentage and standard deviation of three analysed results are presented

| Phase (wt.%) | DGC1 | DGC2 | DGC3 | DGC4 | DGC5 | DGC6 | DGC7 | DGC8 | DGC9 |
| --- | --- | --- | --- | --- | --- | --- | --- | --- | --- |
| Alite (M3) | 37.3  (2.5) | 40.8  (3.7) | 45.7  (0.1) | 46.2  (0.2) | 37.5  (1.6) | 36.7  (0.2) | 37.2  (0.4) | 35.7  (1.5) | 44.6  (2.7) |
| Alite (T1) | 4.9  (0.6) | 5.7  (0.3) | - | 5.0  (0.8) | 9.6  (2.0) | 8.1  (3.3) | 11.5  (0.2) | 3.2  (0.1) | - |
| Alite (r) | - | 0.4  (0.2) | 0.5  (0.2) | - | - | 0.5  (0.2) | - | - | 1.3  (0.1) |
| Belite (Beta) | 10.5  (1.3) | 15.9  (4.2) | 5.4  (1.6) | 7.1  (0.1) | 9.3  (0.2) | 9.6  (1.4) | 5.2  (0.4) | 9.8  (0.9) | 5.2  (0.4) |
| Ferrite | 10.1  (0.0) | 11.1  (0.9) | 10.0  (0.2) | 9.7  (1.1) | 9.1  (0.2) | 10.3  (0.9) | 7.9  (0.2) | 10.1  (1.0) | 7.8  (0.1) |
| Aluminate (cubic) | 1.0  (0.1) | 1.2  (0.2) | 0.7  (0.2) | 2.3  (0.7) | 2.4  (0.0) | 2.5  (0.1) | 1.3  (0.1) | 0.4  (0.4) | 1.8  (0.3) |
| Aluminate (orthorhombic) | - | 0.6  (0.4) | 0.8  (0.4) | 0.7  (0.4) | 1.0  (0.0) | 0.9  (0.8) | 0.7  (0.0) | 0.6  (0.3) | 0.6  (0.6) |
| Wollastonite | 1.9  (0.3) | 2.0  (0.2) | 2.0  (0.5) | 3.0  (0.1) | 1.9  (0.2) | 2.3  (0.1) | 1.6  (0.0) | 2.7  (0.4) | 1.6  (0.2) |
| Periclase | 0.8  (0.2) | 1.5  (0.3) | 2.5  (0.4) | 0.6  (0.1) | 1.1  (0.4) | 2.6  (0.1) | 2.4  (0.1) | 3.1  (0.5) | 3.5  (0.2) |
| Ca-ferrite | - | 0.8  (0.4) | - | - | - | 0.8  (0.1) | 0.1  (0.1) | 0.6  (0.1) | 0.1  (0.1) |
| Hydrogrossular | 2.1  (0.2) | 0.2  (0.2) | 1.1  (0.6) | 1.5  (0.1) | 2.8  (0.6) | - | 0.3  (0.1) | 0.4  (0.3) | 0.9  (0.4) |
| Olivine | 1.1  (1.0) | 2.5  (0.1) | 1.7  (0.3) | 2.5  (0.1) | 1.9  (0.1) | 1.2  (0.0) | 1.9  (0.0) | 1.9  (0.1) | 2.3  (0.2) |
| Dolomite | 0.8  (0.2) | 0.8  (0.1) | 0.6  (0.1) | 0.5  (0.1) | 1.1  (0.1) | 0.4  (0.1) | - | 0.1  (0.1) | 0.4  (0.0) |
| Arcanite | 0.1  (0.1) | 0.3  (0.1) | 0.5  (0.0) | 0.5  (0.1) | 0.1  (0.1) | 0.1  (0.0) | 0.4  (0.0) | 0.8  (0.1) | 0.2  (0.1) |
| Pyrite | 0.2  (0.1) | 0.1  (0.1) | - | 0.5  (0.1) | 0.3  (0.0) | - | 0.4  (0.1) | - | 0.1  (0.1) |
| Syngenite | - | - | - | 0.6  (0.0) | - | 0.1  (0.1) | - | - | 0.1  (0.1) |
| Portlandite | 0.1  (0.1) | 0.1  (0.1) | - | 0.2  (0.0) | - | 0.1  (0.0) | - | 0.4  (0.1) | 0.1  (0.0) |
| Amorphous | 29.1  (2.0) | 16.0  (10.6) | 28.5  (2.7) | 19.1  (0.2) | 21.9  (1.2) | 23.8  (0.4) | 29.1  (0.1) | 30.2  (3.0) | 29.4  (4.9) |
| Rwp | 9.8 | 9.0 | 10.2 | 9.9 | 9.4 | 9.1 | 8.8 | 10.0 | 9.7 |

**Table S3.** QXRPD analysis results of WGC considering C3S (T1 & r). The averaged weight percentage and standard deviation of three analysed results are presented

| Phase (wt.%) | WGC1 | WGC2 | WGC3 | WGC4 | WGC5 | WGC6 | WGC7 | WGC8 | WGC9 |
| --- | --- | --- | --- | --- | --- | --- | --- | --- | --- |
| Alite (M3) | 34.9  (2.2) | 40.9  (0.7) | 40.2  (2.3) | 40.9  (0.2) | 41.3  (1.5) | 38.1  (7.2) | 42.4  (4.5) | 41.7  (1.5) | 45.0  (3.6) |
| Alite (T1) | 6.6  (0.5) | 6.9  (0.3) | 7.5  (1.1) | 6.7  (0.4) | 11.4  (0.2) | 8.0  (2.1) | 8.6  (2.1) | 3.8  (0.6) | 5.3  (0.0) |
| Alite (r) | 19.9  (1.5) | 10.6  (1.0) | 21.2  (4.7) | 21.4  (1.5) | 7.8  (2.1) | 14.0  (8.4) | 12.4  (3.6) | 16.2  (2.4) | 12.8  (3.9) |
| Belite (Beta) | 6.0  (0.7) | 8.7  (1.2) | 1.2  (1.0) | 3.3  (0.7) | 8.6  (1.1) | 7.9  (2.5) | 4.9  (0.3) | 8.1  (1.3) | 4.0  (1.2) |
| Ferrite | 15.1  (1.1) | 16.0  (0.5) | 13.6  (0.8) | 14.5  (0.6) | 12.8  (0.7) | 16.2  (0.4) | 13.4  (1.0) | 14.3  (0.8) | 10.8  (0.1) |
| Aluminate (cubic) | 2.9  (0.6) | 1.1  (0.2) | 3.4  (0.7) | 2.7  (0.9) | 3.2  (0.2) | 3.8  (1.0) | 2.9  (0.7) | 0.6  (0.0) | 2.2  (0.3) |
| Aluminate (orthorhombic) | 0.2  (0.3) | 1.6  (0.2) | 0.8  (0.6) | 1.0  (0.4) | 2.1  (0.2) | 0.9  (0.8) | 2.4  (0.4) | 0.5  (0.0) | 1.9  (0.5) |
| Wollastonite | 3.6  (0.1) | 3.4  (0.8) | 2.3  (0.1) | 2.0  (0.8) | 2.6  (0.3) | 2.1  (0.3) | 2.7  (0.5) | 1.7  (0.2) | 2.4  (0.2) |
| Periclase | 0.6  (0.0) | 1.0  (0.4) | 2.0  (0.3) | 0.7  (0.0) | 0.8  (0.0) | 2.7  (0.3) | 2.4  (0.3) | 4.2  (0.2) | 4.3  (0.0) |
| Ca-ferrite | 3.5  (0.5) | 2.1  (0.5) | 1.3  (0.8) | 1.2  (0.8) | 0.6  (0.3) | 1.0  (0.5) | 1.2  (0.4) | 1.5  (0.0) | 3.5  (1.1) |
| Hydrogrossular | 2.4  (0.2) | 2.4  (0.1) | 0.3  (0.2) | 0.4  (0.0) | 1.8  (0.5) | 1.6  (1.3) | 1.1  (0.9) | 3.8  (0.1) | 2.6  (0.7) |
| Olivine | 1.2  (0.4) | 0.5  (0.1) | 1.1  (0.3) | 1.3  (0.4) | 0.2  (0.2) | 0.2  (0.1) | 0.8  (0.1) | 1.6  (0.5) | 1.3  (0.4) |
| Dolomite | 0.4  (0.1) | 1.2  (0.5) | 0.7  (0.2) | 0.6  (0.2) | 1.3  (0.1) | 0.3  (0.0) | 0.7  (0.2) | 0.2  (0.0) | 0.3  (0.1) |
| Arcanite | 0.9  (0.1) | 0.4  (0.1) | 1.0  (0.1) | 0.3  (0.1) | - | 0.1  (0.1) | 0.6  (0.5) | 0.2  (0.0) | 0.4  (0.0) |
| Pyrite | 0.3  (0.0) | 1.0  (0.4) | 0.9  (0.7) | 0.6  (0.3) | 1.0  (0.7) | 0.3  (0.2) | 0.3  (0.1) | - | 0.6  (0.5) |
| Syngenite | 0.3  (0.1) | 0.4  (0.3) | 0.2  (0.2) | 1.0  (0.8) | 1.2  (0.1) | 0.5  (0.2) | 1.3  (0.1) | 0.3  (0.0) | 0.3  (0.2) |
| Portlandite | 0.3  (0.1) | 0.7  (0.4) | 0.4  (0.0) | 1.2  (0.6) | 2.1  (1.3) | 1.6  (0.2) | 1.5  (1.2) | 0.8  (0.3) | 0.7  (0.0) |
| Amorphous | 0.9  (0.7) | 1.1  (0.8) | 1.9  (0.3) | 0.2  (0.6) | 1.2  (2.8) | 0.7  (0.3) | 0.4  (1.4) | 0.5  (0.2) | 1.6  (3.6) |
| Rwp | 8.0 | 8.1 | 8.2 | 9.1 | 8.4 | 9.7 | 8.5 | 8.7 | 9.1 |
